# Supplementary material for: Mouse Models of Mutations and Variations in Autism Spectrum Disorder-Associated Genes: Mice Expressing Caps2/Cadps2 Copy Number and Alternative Splicing Variants
Source: MDPI journal article supplement (doi:10.3390/ijerph10126335), 2013-11-27
Supplement: s1 [file s1]

**Networks legend**

- Co-localization
- Pathway
- Physical interactions
- Predicted

## Reference

1. GeneMANIA. Available online: <http://www.genemania.org> (accessed on 15 November 2013).
2. Warde-Farley, D.; Donaldson, S.L.; Comes, O.; Zuberi, K.; Badrawi, R.; Chao, P.; Franz, M.; Grouios, C.; Kazi, F.; Lopes, C.T.; *et al.* The GeneMANIA prediction server: Biological network integration for gene prioritization and predicting gene function. *Nucl. Acid. Res.* **2010**, *38*, doi:10.1093/nar/gkq537.

© 2013 by the authors; licensee MDPI, Basel, Switzerland. This article is an open access article distributed under the terms and conditions of the Creative Commons Attribution license (<http://creativecommons.org/licenses/by/3.0/>).
